# Supplementary material for: Fecal microbiota transplantation results in bacterial strain displacement in patients with inflammatory bowel diseases
Source: PubMed Central journal article supplement (PMC6943227; doi:10.1002/2211-5463.12744), 2019-12-13

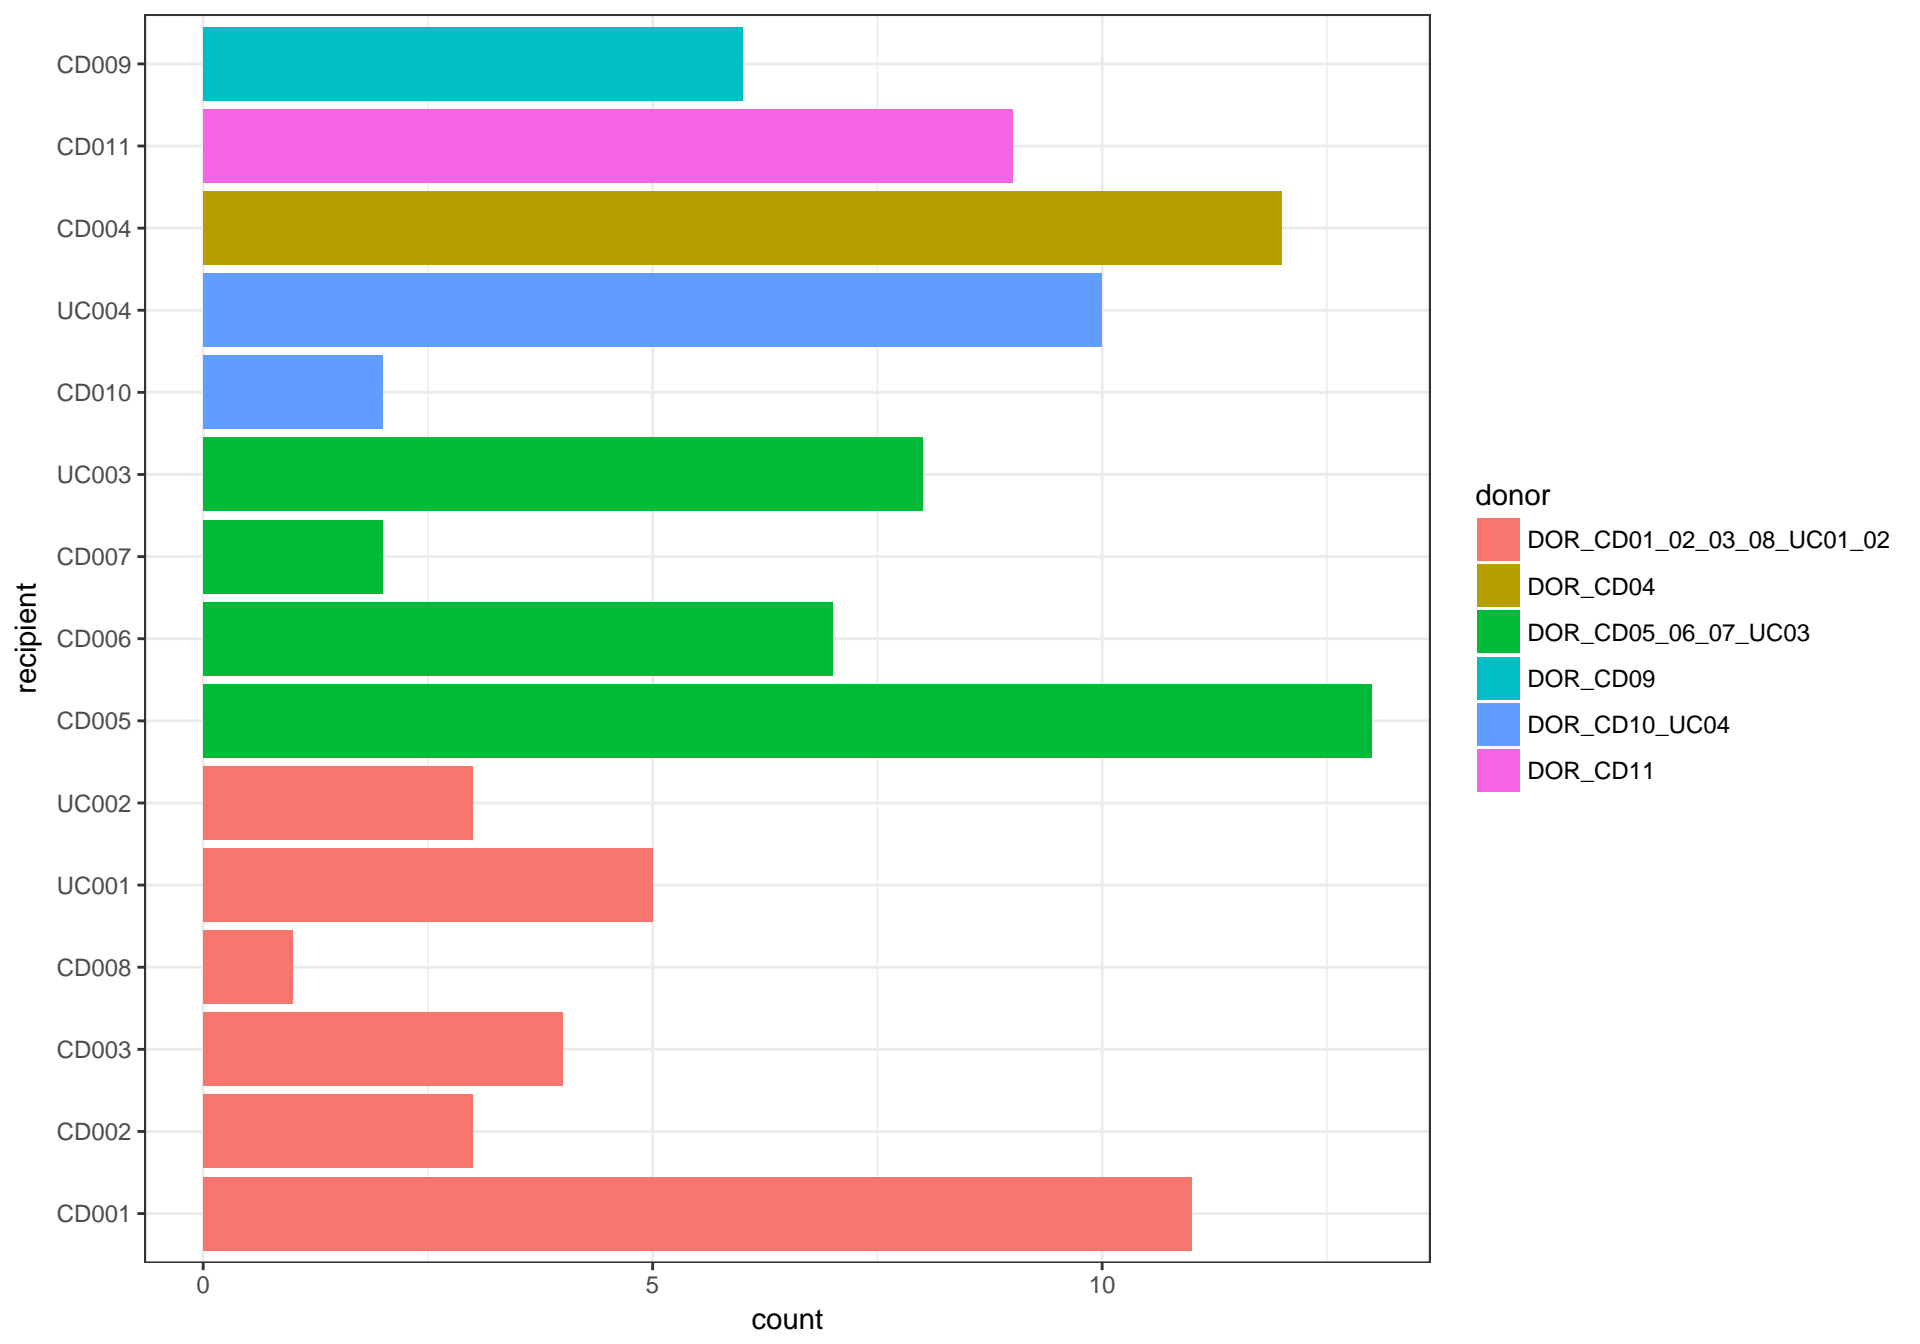

Supplement: FEB4-10-41-s001.pdf [file FEB4-10-41-s001.pdf]
